### Supporting information

**S7 File: The characteristics of the included studies.**

Name of data extractors : Li ruihua,Zhu qiuxia,Dong jingyi

Date of data extraction: 2024.2.10-2024.3.31

| No. | Country                  | Title                                                                                                   | Research aims                                                                                                  | Research method | Variables                                                                                                        | Participants            | Main findings                                               |
|-----|--------------------------|---------------------------------------------------------------------------------------------------------|----------------------------------------------------------------------------------------------------------------|-----------------|------------------------------------------------------------------------------------------------------------------|-------------------------|-------------------------------------------------------------|
|     |                          |                                                                                                         |                                                                                                                |                 | Independent Variables<br>(IV)<br>Mediator Variable (MED)<br>Moderator Variable (MOD)<br>Dependent Variables (DV) |                         |                                                             |
| 1   | (Chao, 2011)<br>American | Managing Stress and Maintaining Well-Being: Social Support, Problem-Focused Coping, and Avoidant Coping | To examine the moderating roles of social support and coping on the association between stress and well-being. | Quantitative    | Stress (IV)<br>Problem-Focused Coping (MED)<br>Social Support (MOD)<br>Avoidant Coping                           | 459<br>College students | The findings highlight the significance of avoidant coping. |

|   |                                   |                                                                                                                           |                                                                                                           |              |                                                                                                                                                                             |                      |                                                                                                                                                                      |
|---|-----------------------------------|---------------------------------------------------------------------------------------------------------------------------|-----------------------------------------------------------------------------------------------------------|--------------|-----------------------------------------------------------------------------------------------------------------------------------------------------------------------------|----------------------|----------------------------------------------------------------------------------------------------------------------------------------------------------------------|
|   |                                   |                                                                                                                           |                                                                                                           |              | (MOD)<br>Well-Being (DV)                                                                                                                                                    |                      |                                                                                                                                                                      |
| 2 | (Kim & Lee, 2011)<br>American     | The Facebook paths to happiness: Effects of the number of Facebook friends and self-presentation on subjective well-being | To investigate whether and how Facebook increases college-age users' subjective well-being.               | Quantitative | Number of Facebook Friends (IV)<br>Positive self-presentation (IV)<br>Honest self-presentation (IV)<br><br>Perceived social support (MED)<br><br>Subjective Well-Being (DV) | 391 college students | The findings indicated that honest self-presentation may enhance happiness rooted in the social support provided.                                                    |
| 3 | (Siewert et al., 2011)<br>Germany | The more, the better. The relationship between mismatches in social support and subjective well-being in daily life       | To examine the relationship between desired and received support and subjective well-being discrepancies. | Quantitative | social support (IV)<br><br>subjective well-being (DV)                                                                                                                       | 30 undergraduates    | Results showed that under-provision of support predicted lower well-being, whereas overprovision was related to higher well-being, suggesting a linear relationship. |
| 4 | (Yalçın, 2011)<br>Turkey          | Social Support and Optimism as Predictors of Life Satisfaction of                                                         | To investigate the predictive value of optimism,                                                          | Quantitative | Social Support (IV)<br>Optimism (IV)                                                                                                                                        | 130 students         | Results showed that perceived support from family, perceived                                                                                                         |

|   |                              |                                                                                                                             |                                                                                                                                   |              |                                                                                                                       |                                |                                                                                                                                                                                                |
|---|------------------------------|-----------------------------------------------------------------------------------------------------------------------------|-----------------------------------------------------------------------------------------------------------------------------------|--------------|-----------------------------------------------------------------------------------------------------------------------|--------------------------------|------------------------------------------------------------------------------------------------------------------------------------------------------------------------------------------------|
|   |                              | College Students                                                                                                            | perceived support from family, and perceived support from faculty in determining college students' life satisfaction.             |              | Life Satisfaction (DV)                                                                                                |                                | faculty support, and optimism were statistically significant predictors of life satisfaction.                                                                                                  |
| 5 | (Peng et al., 2012)<br>China | Adverse life events and mental health of Chinese medical students: The effect of resilience, personality and social support | To test the moderating effect of resilience between adverse life events and mental health problems.                               | Quantitative | Adverse life events (IV)<br>Personality (IV)<br>Social support (IV)<br><br>Resilience (MED)<br><br>Mental health (DV) | 1,998 Chinese medical students | Results showed that mental health problems had a positive correlation with adverse life events and neuroticism. Resilience moderated negative life events and mental health problems.          |
| 6 | (Kong & You, 2013)<br>China  | Loneliness and Self-Esteem as Mediators Between Social Support and Life Satisfaction in Late Adolescence                    | To examine the mediation effects of loneliness and self-esteem for the relationship between social support and life satisfaction. | Quantitative | Social Support (IV)<br><br>Loneliness<br>Self-Esteem (MED)<br><br>Sexes (MOD)<br><br>Life Satisfaction (DV)           | 389 Chinese college students   | Results showed full mediation effects of loneliness and self-esteem between social support and life satisfaction. The final model also revealed a significant path from social support through |

|   |                                       |                                                                                                                                              |                                                                                                                                        |              |                                                             |                                                                                             |                                                                                                                                                                                                                   |
|---|---------------------------------------|----------------------------------------------------------------------------------------------------------------------------------------------|----------------------------------------------------------------------------------------------------------------------------------------|--------------|-------------------------------------------------------------|---------------------------------------------------------------------------------------------|-------------------------------------------------------------------------------------------------------------------------------------------------------------------------------------------------------------------|
|   |                                       |                                                                                                                                              |                                                                                                                                        |              |                                                             |                                                                                             | loneliness and self-esteem to life satisfaction.                                                                                                                                                                  |
| 7 | (Kong et al., 2013)<br>China          | Self-esteem as mediator and moderator of the relationship between social support and subjective well-being among Chinese university students | To examine global self-esteem's mediating and moderating effects on the relationship between social support and subjective well-being. | Quantitative | Social Support (IV)<br>Subjective Well-Being (DV)           | 391 university students (260 males and 131 females) from two different Chinese universities | Results showed that global self-esteem partially mediated the influence of social support on life satisfaction and positive affect, whereas it fully mediated the influence of social support on negative affect. |
| 8 | (Matsuda et al., 2014)<br>Japan       | Association between perceived social support and subjective well-being among Japanese, Chinese, and Korean college students                  | To examine the associations between perceived social support and SWB among Japanese, Chinese, and Korean college students.             | Quantitative | Perceived Social Support (IV)<br>Subjective Well-Being (DV) | 1332 college students                                                                       | Results showed that family support reduced NA and significant others' support improved PA and that both types of support were associated with life satisfaction among the three groups.                           |
| 9 | American(Oh et al., 2014)<br>American | How does online social networking enhance life satisfaction? The relationships among online                                                  | To examine whether supportive interactions on social networking sites                                                                  | Quantitative | Number of SNS Friends (IV)<br>Frequency of SNS Use (IV)     | 339 adult participants                                                                      | Results showed a positive relationship between supportive interaction and                                                                                                                                         |

|    |                                      |                                                                                                                                |                                                                                                                                                     |              |                                                                                                                            |                                    |                                                                                                                                                                                        |
|----|--------------------------------------|--------------------------------------------------------------------------------------------------------------------------------|-----------------------------------------------------------------------------------------------------------------------------------------------------|--------------|----------------------------------------------------------------------------------------------------------------------------|------------------------------------|----------------------------------------------------------------------------------------------------------------------------------------------------------------------------------------|
|    |                                      | supportive interaction, affect, perceived social support, sense of community, and life satisfaction                            | mediate the influence of SNS use and the number of SNS friends on perceived social support, effect, sense of community, and life satisfaction.      |              | Supportive Interaction Positive Affect (MED)<br><br>Supportive Interaction (DV) Positive Affect (DV) Life Satisfaction(DV) |                                    | positive affect after the interaction.                                                                                                                                                 |
| 10 | China(Sun et al., 2014)<br><br>China | Gratitude and school well-being among Chinese university students: Interpersonal relationships and social support as mediators | To investigate the relationship between gratitude and school well-being and the mediating effect of interpersonal relationships and social support. | Quantitative | Gratitude (IV)<br><br>Interpersonal relationships (MED)<br>Social support (MED)<br><br>Sense of Community (DV)             | 782 Chinese undergraduate students | Results revealed that gratitude was positively associated with school well-being and that both interpersonal relationships and social support acted as mediators of this relationship. |
| 11 | (Kong et al., 2015)<br><br>China     | The relationships among gratitude, self-esteem, social support, and life satisfaction among undergraduate students             | To examine the effects of social support and self-esteem on the association between gratitude and life satisfaction among undergraduate             | Quantitative | Gratitude (IV)<br><br>Self-esteem (MED)<br>Social Support (MED)<br>Life Satisfaction(MED)<br><br>Gender (MOD)              | 427 Chinese undergraduate          | Results indicated that social support fully mediates the association between gratitude and life satisfaction.                                                                          |

|    |                                     |                                                                                                                               |                                                                                                                                                                                                                                                 |              |                                                                                                   |                         |                                                                                                                                                               |
|----|-------------------------------------|-------------------------------------------------------------------------------------------------------------------------------|-------------------------------------------------------------------------------------------------------------------------------------------------------------------------------------------------------------------------------------------------|--------------|---------------------------------------------------------------------------------------------------|-------------------------|---------------------------------------------------------------------------------------------------------------------------------------------------------------|
|    |                                     |                                                                                                                               | students.                                                                                                                                                                                                                                       |              | School well-being (DV)                                                                            |                         |                                                                                                                                                               |
| 12 | (Wang et al., 2015)<br><br>American | Social Ties, Communication Channels, and Personal Well-Being: A Study of the Networked Lives of College Students in Singapore | To analyze the personal networks of 379 college students in Singapore to explore the social affordances of traditional and new channels in communicating with different social relationships and their associations with individual well-being. | Quantitative | Strong and weak ties (IV)<br>Communication Channels (IV)<br><br>Personal Well-Being (DV)          | 379 college students    | Results suggest that communication channels play a complex role in how strong and weak ties are related to personal well-being.                               |
| 13 | (Kase et al., 2016)<br><br>Japan    | Process linking social support to mental health through a sense of coherence in Japanese university students                  | To investigate the relationships among mental health, a "sense of coherence" (SOC), and social support in Japanese university students, focusing on gender differences.                                                                         | Quantitative | Social support (IV)<br><br>Sense of coherence (MED)<br><br>Gender (MOD)<br><br>Mental health (DV) | 548 university students | Results showed that improvement in social support may effectively strengthen SOC as a precaution against the decline of mental health in university students. |

|    |                                          |                                                                                                                             |                                                                                                                                                     |              |                                                                                                                 |                                    |                                                                                                                                                              |
|----|------------------------------------------|-----------------------------------------------------------------------------------------------------------------------------|-----------------------------------------------------------------------------------------------------------------------------------------------------|--------------|-----------------------------------------------------------------------------------------------------------------|------------------------------------|--------------------------------------------------------------------------------------------------------------------------------------------------------------|
| 14 | (Lin, 2016)<br><br>China                 | The roles of social support and coping style in the relationship between gratitude and well-being                           | To examine the roles of social support and coping style in the relationship between gratitude and well-being                                        | Quantitative | Gratitude (IV)<br><br>Social support (MED)<br><br>Coping style (MED)<br><br>Ethnic (MOD)<br><br>Well-being (DV) | 750 Taiwanese college students     | Results showed that females with higher social support tended to use more active coping strategies when encountering a problem than their male counterparts. |
| 15 | (Zeidner & Matthews, 2016)<br><br>Israel | Ability to emotional intelligence and mental health: Social support as a mediator                                           | To examine the association between ability emotional intelligence (EI) and psychological distress.                                                  | Quantitative | Ability (IV)<br><br>Emotional intelligence (IV)<br><br>Social support (MED)<br><br>Mental health (DV)           | 185 Israeli undergraduate students | Results showed that social support was a significant mediator of the effects of EI on distress.                                                              |
| 16 | (Tan et al., 2017)<br><br>Malaysia       | The role of self-esteem and social support in the relationship between extraversion and happiness: A serial mediation model | To propose and test a path model illustrating the mediating effects of self-esteem and social support on the linkage of extraversion and happiness. | Quantitative | Extraversion (IV)<br><br>Self-Esteem (MED)<br>Social Support (MED)<br><br>Happiness (DV)                        | 311 Undergraduate students         | Results showed that self-esteem and social support mediated the relationship between extraversion and happiness.                                             |

|    |                                             |                                                                                                                                 |                                                                                                                                                                          |              |                                                                                                                            |                                           |                                                                                                                                                                                    |
|----|---------------------------------------------|---------------------------------------------------------------------------------------------------------------------------------|--------------------------------------------------------------------------------------------------------------------------------------------------------------------------|--------------|----------------------------------------------------------------------------------------------------------------------------|-------------------------------------------|------------------------------------------------------------------------------------------------------------------------------------------------------------------------------------|
| 17 | (Alorani & Alradaydeh, 2018)<br><br>Jordan  | Spiritual Well-being Perceived Social Support, and life satisfaction among university students                                  | To identify the relationship between spiritual well-being, perceived social support, and life satisfaction.                                                              | Quantitative | Spiritual well-being (IV)<br><br>Perceived social support (DV)                                                             | 919 students at the University of Jordan  | Results showed that both domains of spiritual well-being had a significant positive correlation with all sources of perceived social support.                                      |
| 18 | (Lee et al., 2018)<br><br>Republic of Korea | Network Environments and Well-Being: An Examination of Personal Network Structure, Social Capital, and Perceived Social Support | To test the structural characteristics of personal networks, the distinction between offline and online social capital, and different indicators of well-being outcomes. | Quantitative | Personal Network Structure (IV)<br>Social Capital (IV)<br><br>Perceived Social Support (MED)<br><br>Life satisfaction (DV) | 574 college students                      | Results showed that two dimensions of personal networks—density and gender homophily—and social capital in the form of offline bonding capital explained perceived social support. |
| 19 | (Roming & Howard, 2019)<br><br>American     | Coping with stress in college: An examination of spirituality, social support, and quality of life                              | To evaluate specific adaptive coping strategies, including spirituality, social support, and healthy behaviors, that are associated with better                          | Quantitative | Stress (IV)<br>Spirituality (IV)<br>Social support (IV)<br><br>Perceived Social Support (DV)                               | 440 college students in the United States | Spiritual growth and social support were essential adaptive factors connected to a better quality of life for college students.                                                    |

|    |                                          |                                                                                                                                                                            |                                                                                                                                                                                                                               |              |                                                                                         |                                                                |                                                                                                                                             |
|----|------------------------------------------|----------------------------------------------------------------------------------------------------------------------------------------------------------------------------|-------------------------------------------------------------------------------------------------------------------------------------------------------------------------------------------------------------------------------|--------------|-----------------------------------------------------------------------------------------|----------------------------------------------------------------|---------------------------------------------------------------------------------------------------------------------------------------------|
|    |                                          |                                                                                                                                                                            | quality of life in a college student population.                                                                                                                                                                              |              |                                                                                         |                                                                |                                                                                                                                             |
| 20 | (Kuczynski et al., 2020)<br><br>American | Differential associations between interpersonal variables and quality-of-life in a Sample of College Students                                                              | To estimate a path model, we looked at the unique variance accounted for by each, and finally, we used network analysis to examine the network of direct and indirect associations among these variables and quality of life. | Quantitative | Interpersonal Variables (IV)<br><br>Well-Being (DV)                                     | 1,456 students from four universities across the United States | Results showed that loneliness had the strongest association with quality of life across all analyses.                                      |
| 21 | (Ma, 2020)<br><br>China                  | The Relationship Between Social Support and Life Satisfaction Among Chinese and Ethnic Minority Adolescents in Hong Kong: the Mediating Role of Positive Youth Development | To investigate whether positive youth development mediated the relationship between social support and life satisfaction and b) compare whether these associations varied with                                                | Quantitative | Social Support (IV)<br><br>Positive Youth Development (MED)<br><br>Quality of life (DV) | 700 Chinese and ethnic minority adolescents in Hong Kong       | Results showed that positive youth development does play a mediating role in the relationship between social support and life satisfaction. |

|    |                                                 |                                                                                                                                                             |                                                                                                                                                                                              |              |                                                                                                              |                                                             |                                                                                                                                                                                                                                 |
|----|-------------------------------------------------|-------------------------------------------------------------------------------------------------------------------------------------------------------------|----------------------------------------------------------------------------------------------------------------------------------------------------------------------------------------------|--------------|--------------------------------------------------------------------------------------------------------------|-------------------------------------------------------------|---------------------------------------------------------------------------------------------------------------------------------------------------------------------------------------------------------------------------------|
|    |                                                 |                                                                                                                                                             | ethnicity.                                                                                                                                                                                   |              |                                                                                                              |                                                             |                                                                                                                                                                                                                                 |
| 22 | (Yildirim & Tanrıverdi, 2020)<br>United Kingdom | Social Support, Resilience, and Subjective Well-being in College Students                                                                                   | To test the psychometric properties and dimensionality of the BPSSQ in Turkish and the mediating effect of resilience in the relationship between social support and satisfaction with life. | Quantitative | Social support (IV)<br>Resilience (MED)<br>Quality-of-Life (DV)                                              | 202 college students                                        | Results showed that social support significantly predicted resilience and satisfaction with life. Resilience also predicts satisfaction with life.                                                                              |
| 23 | (Arslan, 2021)<br>Turkey                        | Psychological Maltreatment and Spiritual Well-being in Turkish College Young Adults: Exploring the Mediating Effect of College Belonging and Social Support | To examine whether college belonging and social support mediate the association between childhood psychological maltreatment and spiritual well-being among college young adults.            | Quantitative | Psychological Maltreatment (IV)<br>College Belonging (MED)<br>Social Support (MED)<br>Life Satisfaction (DV) | 493 college young adults                                    | The results showed that psychological maltreatment not only had a direct predictive effect on spiritual well-being but also an indirect predictive effect on spiritual well-being through college belonging and social support. |
| 24 | (Brunsting et al., 2021)                        | Sources of Perceived Social Support, social-emotional experiences, and                                                                                      | To advance an understanding of international students' psychological                                                                                                                         | Quantitative | Perceived Social Support (IV)<br>Social Emotional Experiences                                                | 126 Graduate and undergraduate international students) from | Results showed that perceived social support from domestic students in the fall                                                                                                                                                 |

|    |                                           |                                                                                                                   |                                                                                                                                                                                    |              |                                                                           |                                                                                                                            |                                                                                                                                                            |
|----|-------------------------------------------|-------------------------------------------------------------------------------------------------------------------|------------------------------------------------------------------------------------------------------------------------------------------------------------------------------------|--------------|---------------------------------------------------------------------------|----------------------------------------------------------------------------------------------------------------------------|------------------------------------------------------------------------------------------------------------------------------------------------------------|
|    | American                                  | psychological well-being of international students                                                                | well-being and social-emotional experiences, we tested whether specific social influences could enhance international students' belonging and well-being and attenuate loneliness. |              | (MED)<br>satisfaction with life (DV)                                      | two universities in the United States                                                                                      | predicted higher belonging in the subsequent spring, while perceived faculty social support in the fall predicted lower loneliness in the spring.          |
| 25 | (Deichert et al., 2021)<br>American       | Gratitude enhances the beneficial effects of social support on psychological well-being                           | To experimentally examine whether gratitude improved the benefits of receiving support during stress.                                                                              | Quantitative | Social support (IV)<br>Spiritual Well-being (DV)                          | 127 college students                                                                                                       | Results showed a significant interaction between gratitude and receiving social support during the speech.                                                 |
| 26 | (Holliman et al., 2021)<br>United Kingdom | Adaptability and Social Support: Examining Links with Psychological Well-being Among UK Students and Non-students | To investigate the roles of adaptability and social support in predicting various psychological outcomes.                                                                          | Quantitative | Adaptability (IV)<br>Social Support (IV)<br>Psychological Well-being (DV) | Study 1: Year 12 college students (N = 73);<br>Study 2: university students (N = 102);<br>Study 3: non-studying members of | Results showed that beyond variance attributable to social support, adaptability significantly contributed to psychological well-being (life satisfaction, |

|    |                                               |                                                                               |                                                                                                                                                                |              |                                                                                  |                                                                                                                                                                                                                                                                                         |                                                                                                                                                                                                  |
|----|-----------------------------------------------|-------------------------------------------------------------------------------|----------------------------------------------------------------------------------------------------------------------------------------------------------------|--------------|----------------------------------------------------------------------------------|-----------------------------------------------------------------------------------------------------------------------------------------------------------------------------------------------------------------------------------------------------------------------------------------|--------------------------------------------------------------------------------------------------------------------------------------------------------------------------------------------------|
|    |                                               |                                                                               |                                                                                                                                                                |              |                                                                                  | the general public (N = 141;                                                                                                                                                                                                                                                            | well-being, flourishing, and general affect) and psychological distress across all studies.                                                                                                      |
| 27 | (Johnson & Riley Jb Ms, 2021)<br><br>American | Psychosocial impacts on college students providing mental health peer support | To examine the psychosocial effects of providing mental health peer support to college student peer support workers compared to other trained student workers. | Quantitative | Mental health (IV)<br><br>Peer support (IV)<br><br>Psychological well-being (DV) | Seventy-five students responded to the post-training survey. Six to ten weeks in their student worker position later, 53 students responded to the follow-up survey. Of the 75 students who initially responded, 53 were peer supporters, and 22 were non-peer support student workers. | Results showed that peer supporters flourished less after training than the control group. After 6 weeks of work, peer supporters exhibited lowered avoidance coping and more belonging support. |
| 28 | (Kalaitzaki et al., 2021)                     | Social capital, social support and perceived stress in college students:      | To examine whether online and offline social capital                                                                                                           | Quantitative | Social capital (IV)<br>Social support (IV)                                       | 403 undergraduate Greek college                                                                                                                                                                                                                                                         | Results showed that different personal ties/relationships                                                                                                                                        |

|    |                                   |                                                                                                                                   |                                                                                                                                                                                  |              |                                                                              |                                 |                                                                                                                 |
|----|-----------------------------------|-----------------------------------------------------------------------------------------------------------------------------------|----------------------------------------------------------------------------------------------------------------------------------------------------------------------------------|--------------|------------------------------------------------------------------------------|---------------------------------|-----------------------------------------------------------------------------------------------------------------|
|    | Greece                            | The role of resilience and life satisfaction                                                                                      | and offline social support are associated with less perceived stress in 403 undergraduate Greek college students through the mediating role of resilience and life satisfaction. |              | Resilience (MED)<br>Life satisfaction (MED)<br>Psychological Well-being (DV) |                                 | are associated with perceived stress through diversified pathways, which are different for men and women.       |
| 29 | (Liu, 2021)<br>China              | Social support mediates the effect of forgiveness on subjective well-being in college students.                                   | To explore the relationship between forgiveness and subjective well-being (SWB) and the mediating effect of social support in this relationship.                                 | Quantitative | Forgiveness (IV)<br>Social support (MED)<br>Psychosocial impacts (DV)        | 443 college students from Henan | Results showed that both interpersonal forgiveness and self-forgiveness were significantly correlated with SWB. |
| 30 | (Arroyo et al., 2022)<br>American | Direct and indirect associations among self-disclosure skills, social support, and psychosocial outcomes during the transition to | To explore direct and indirect associations between self-disclosure skills, social support, and psychosocial outcomes                                                            | Quantitative | Self-disclosure skills (IV)<br>Social support (IV)<br>Perceived stress (DV)  | 345 participants                | Results showed that more friend support was associated with better psychosocial outcomes between participants.  |

|    |                                   |                                                                                                                         |                                                                                                                                                                                                                                              |              |                                               |                                                                                                          |                                                                                                                                                                                                                                                                                                     |
|----|-----------------------------------|-------------------------------------------------------------------------------------------------------------------------|----------------------------------------------------------------------------------------------------------------------------------------------------------------------------------------------------------------------------------------------|--------------|-----------------------------------------------|----------------------------------------------------------------------------------------------------------|-----------------------------------------------------------------------------------------------------------------------------------------------------------------------------------------------------------------------------------------------------------------------------------------------------|
|    |                                   | college                                                                                                                 | during the transition to college. Incoming college students in the U.S. completed online surveys throughout their first academic year.                                                                                                       |              |                                               |                                                                                                          |                                                                                                                                                                                                                                                                                                     |
| 31 | (Asghar et al., 2022)<br>American | Perceived Factors Contributing to the Subjective Well-being of Undergraduate Engineering Students: An Exploratory Study | To investigate the condition of subjective well-being (SWB) of undergraduate engineering students to understand the factors that they perceive as positively contributing to their overall well-being in an engineering college environment. | Qualitative  | Loneliness (IV)<br>Subjective well-being (DV) | eight undergraduate engineering students (3 women, five men, 1 Asian White, 2 Latinx White, and 5 White) | The resulting 11 themes were then re-grouped and conceptualized into seven factors (faculty support, learning experiences, support environment, financial support, engineering practice opportunities, task organization, and task orientation) for precise mapping, understanding, and explanation |
| 32 | (Cinalioglu & Gazioglu,           | Psychological Well-Being in Emerging                                                                                    | To examine the psychological well-being of                                                                                                                                                                                                   | Quantitative | Social Support (IV)<br>Sibling                | 422 university students                                                                                  | Results showed that loneliness, attitudes towards                                                                                                                                                                                                                                                   |

|    |                                 |                                                                                                                                                                              |                                                                                                                                                                                                      |              |                                                                                                             |                                               |                                                                                                                                                                                                                                                                  |
|----|---------------------------------|------------------------------------------------------------------------------------------------------------------------------------------------------------------------------|------------------------------------------------------------------------------------------------------------------------------------------------------------------------------------------------------|--------------|-------------------------------------------------------------------------------------------------------------|-----------------------------------------------|------------------------------------------------------------------------------------------------------------------------------------------------------------------------------------------------------------------------------------------------------------------|
|    | 2022)<br>Turkey                 | Adulthood: The Role of Loneliness, Social Support, and Sibling Relationships in Turkey                                                                                       | Turkish emerging adults in terms of loneliness, dimensions of perceived social support, and attitudes toward sibling relationships.                                                                  |              | Relationships (IV)<br><br>Psychosocial outcomes (DV)                                                        |                                               | sibling relations, and perceived social support from family were significant predictors of psychological well-being.                                                                                                                                             |
| 33 | (Fan & Liu, 2022)<br>China      | Exploring the associations among perceived Teacher emotional support, resilience, COVID-19 anxiety, and mental well-being: evidence from Chinese vocational college students | To examine the relationship between perceived teacher emotional support, Covid-19 anxiety, resilience, and mental well-being among Chinese vocational college students during the Covid-19 pandemic. | Quantitative | Perceived teacher emotional support (IV)<br><br>Covid-19 anxiety (MED)<br><br>Psychological Well-Being (DV) | 1469 Chinese vocational college students      | Results showed that teacher emotional support was an essential promoter for building up mental well-being but not a buffer for COVID-19 within the Chinese cultural context, and COVID-19 anxiety was significantly and negatively related to mental well-being. |
| 34 | (Guan et al., 2022)<br>American | Providing Support Differentially Affects Asian American and Latinx Psychosocial and                                                                                          | To test how providing support can confer benefits, particularly for Asian American                                                                                                                   | Quantitative | Resilience (IV)<br><br>Mental well-being (DV)                                                               | 48 Asian American and Latinx college students | Results showed that those who supported a family member experienced higher self-esteem                                                                                                                                                                           |

|    |                                       |                                                                                                                                                         |                                                                                                                                                                                                                                                                                |              |                                                                                                      |                                                   |                                                                                                                                                                                                                  |
|----|---------------------------------------|---------------------------------------------------------------------------------------------------------------------------------------------------------|--------------------------------------------------------------------------------------------------------------------------------------------------------------------------------------------------------------------------------------------------------------------------------|--------------|------------------------------------------------------------------------------------------------------|---------------------------------------------------|------------------------------------------------------------------------------------------------------------------------------------------------------------------------------------------------------------------|
|    |                                       | Physiological Well-Being: A Pilot Study                                                                                                                 | and Latinx individuals.                                                                                                                                                                                                                                                        |              |                                                                                                      |                                                   | than those in the control condition.                                                                                                                                                                             |
| 35 | (Haliwa et al., 2022)<br><br>American | Risk and protective factors for college students' psychological health during the COVID-19 pandemic                                                     | To identify risk (e.g., perceived risk of contracting COVID-19) and protective factors (i.e., social support, mindfulness) for positive (i.e., subjective happiness, satisfaction with life) and negative (i.e., depression, anxiety, stress) aspects of psychological health. | Quantitative | Providing Support (IV)<br><br>Psychosocial and Physiological Well-Being (DV)                         | 251 college students at a mid-Atlantic university | Results showed that a greater perceived risk of contracting COVID-19 was associated with more significant depression, anxiety, and stress. Greater mindfulness was a protective factor for psychological health. |
| 36 | (Huang & Zhang, 2022)<br><br>China    | Perceived Social Support, Psychological Capital, and Subjective Well-Being among College Students in the Context of Online Learning during the COVID-19 | To examine the relationship between perceived social support and subjective well-being among college students in the context of online learning                                                                                                                                | Quantitative | Risk and protective factors (IV)<br><br>Psychological Capital (MED)<br><br>Psychological health (DV) | 515 college students in China                     | The results showed that perceived social support was significantly and positively associated with life satisfaction and positive affect and was significantly and                                                |

|    |                                |                                                                                                                                                                      |                                                                                                                                                                                                              |              |                                                                                                                                         |                                            |                                                                                                                                                                                                                                                                                                                                                                              |
|----|--------------------------------|----------------------------------------------------------------------------------------------------------------------------------------------------------------------|--------------------------------------------------------------------------------------------------------------------------------------------------------------------------------------------------------------|--------------|-----------------------------------------------------------------------------------------------------------------------------------------|--------------------------------------------|------------------------------------------------------------------------------------------------------------------------------------------------------------------------------------------------------------------------------------------------------------------------------------------------------------------------------------------------------------------------------|
|    |                                | Pandemic                                                                                                                                                             | during the COVID-19 pandemic.                                                                                                                                                                                |              |                                                                                                                                         |                                            | negatively related to negative affect among college students learning online during the COVID-19 pandemic.                                                                                                                                                                                                                                                                   |
| 37 | (Huang & Zhang, 2022)<br>China | The influence of college students' academic stressors on mental health during COVID-19: The mediating effect of social support, social well-being, and self-identity | To investigate the influence of academic stressors on mental health and the mediating effect of social support, social well-being, and self-identity among college students during the outbreak of COVID-19. | Quantitative | Perceived Social Support (IV)<br><br>Social support (MED)<br>Social well-being<br>Self-identity (MED)<br><br>Subjective Well-Being (DV) | 900 college students                       | The results showed that (1) academic stressors had a significantly negative correlation with social support, social well-being, and self-identity while having a significantly positive correlation with mental health; (2) academic stressors could positively predict mental health; (3) this effect was mediated by social support, social well-being, and self-identity. |
| 38 | (Mahasneh, 2022)               | The Relationship between Subjective Well-being and                                                                                                                   | To identify any significant gender differences in                                                                                                                                                            | Quantitative | Students' academic stressors (IV)                                                                                                       | 679 male and female undergraduate students | Results showed no significant differences in the level of subjective                                                                                                                                                                                                                                                                                                         |

|    |                                   |                                                                                                       |                                                                                                                                                                                                         |              |                                                                                                       |                                |                                                                                                                                                                                                                              |
|----|-----------------------------------|-------------------------------------------------------------------------------------------------------|---------------------------------------------------------------------------------------------------------------------------------------------------------------------------------------------------------|--------------|-------------------------------------------------------------------------------------------------------|--------------------------------|------------------------------------------------------------------------------------------------------------------------------------------------------------------------------------------------------------------------------|
|    | Jordan                            | Social Support among Jordanian University Students                                                    | the level of subjective well-being and to examine the relationship between subjective well-being and social support among a sample of Hashemite University students.                                    |              | Mental health (DV)                                                                                    | from the Hashemite University  | well-being due to the gender variable but indicated substantial differences between genders in satisfaction with academics and school connectedness.                                                                         |
| 39 | (Shangguan et al., 2022)<br>China | Expressive flexibility and mental health: The mediating role of social support and gender differences | To explore whether social support mediated the association between expressive flexibility and depression as well as life satisfaction and whether there were gender differences in these relationships. | Quantitative | Social Support (IV)<br>Social Support (MED)<br>Gender Differences (MED)<br>Subjective Well-being (DV) | 711 voluntary college students | Results showed that expressive flexibility positively affected life satisfaction, and social support mediated this association. Social support also mediated the relationship between expressive flexibility and depression. |
| 40 | (Shuo et al., 2022)<br>China      | The Relationship Between Postgraduates' Emotional Intelligence and                                    | To explore the relationship between postgraduates' emotional                                                                                                                                            | Quantitative | Expressive Flexibility (IV)<br>Social Support (MED)                                                   | 1,228 postgraduates            | Results showed a chain effect between postgraduates' social support and                                                                                                                                                      |

|    |                                           |                                                                                                                            |                                                                                                                                                                            |              |                                                                                       |                                      |                                                                                                                        |
|----|-------------------------------------------|----------------------------------------------------------------------------------------------------------------------------|----------------------------------------------------------------------------------------------------------------------------------------------------------------------------|--------------|---------------------------------------------------------------------------------------|--------------------------------------|------------------------------------------------------------------------------------------------------------------------|
|    |                                           | Well-Being: The Chain Mediating Effect of Social Support and Psychological Resilience                                      | intelligence and well-being by investigating the mediating effects of social support and psychological resilience.                                                         |              | Psychological Resilience(MED)<br><br>Mental Health (DV)                               |                                      | psychological resilience mediated by their emotional intelligence and well-being.                                      |
| 41 | (Cahuas et al., 2023)<br><br>American     | Perceived social support and COVID-19 impact on quality of life in college students: an observational study                | To assess the current status of perceived social support and COVID-19 impact.                                                                                              | Quantitative | Postgraduates' Emotional Intelligence (IV)<br><br>Gender (MOD)<br><br>Well-Being (DV) | 1296 university students             | Results showed that perceived social support from family significantly predicted the total sample.                     |
| 42 | (Fiset & Robertson, 2023)<br><br>American | Navigating the support landscape: Bridging the divide between social support in business schools and student mental health | To test internal stakeholders (e.g., faculty, student peers, administrators, and staff) in which ways they can engage to improve student mental health outcomes on campus. | Quantitative | Perceived social support (IV)<br>COVID-19 impact (IV)<br><br>quality of life (DV)     | 205 current business school students | Results showed that student's mental health is positively related to perceived support from faculty and student peers. |
| 43 | (Galián & Ato, 2023)<br><br>Spain         | The mediating role of negative affect in the relationship between family functioning and                                   | To test the link between these factors is scarcely considered in emerging                                                                                                  | Quantitative | Social support (IV)<br><br>Negative affect (MED)                                      | 347 college students                 | Results showed that moderate family cohesion and flexibility scores were positively                                    |

|    |                                        |                                                                                                                                                           |                                                                                                                                                                    |              |                                                                                                                     |                                 |                                                                                                                                                 |
|----|----------------------------------------|-----------------------------------------------------------------------------------------------------------------------------------------------------------|--------------------------------------------------------------------------------------------------------------------------------------------------------------------|--------------|---------------------------------------------------------------------------------------------------------------------|---------------------------------|-------------------------------------------------------------------------------------------------------------------------------------------------|
|    |                                        | subjective happiness in Spanish college students                                                                                                          | adulthood.                                                                                                                                                         |              | Student mental health (DV)                                                                                          |                                 | associated with a young person's subjective happiness.                                                                                          |
| 44 | (Hossain et al., 2023)<br>Bangladesh   | Antecedents and Consequences of Self-Disclosure in Subjective Well-Being: A Facebook Case With a Social Support Mediator                                  | To investigate antecedents and consequences of self-disclosure in subjective well-being with social support as a mediator.                                         | Quantitative | family functioning (IV)<br>Social Support (MED)<br>subjective happiness (DV)                                        | 244 respondents                 | Results showed that self-disclosure significantly depends on information, social influence, and social media use.                               |
| 45 | (Qian et al., 2023)<br>China           | The Impact of Online Social Behavior on College Student's Life Satisfaction: Chain-Mediating Effects of Perceived Social Support and Core Self-Evaluation | To examine the influence of social behavior on college student's life satisfaction and the mediating effects of perceived social support and core self-evaluation. | Quantitative | Self-Disclosure (IV)<br>Perceived Social Support (MED)<br>Core Self Evaluation (MED)<br>Subjective Well-Being (DV)  | 779 college students            | Results showed that online social behavior significantly positively predicted perceived social support and life satisfaction.                   |
| 46 | (Van Petegem et al., 2008)<br>American | Distress, Social Support, and Self-Compassion: Relationships with Mental Health Among College Students                                                    | To investigate how distress, conceptualized as an interaction between hassles and stress perceptions, related to mental health.                                    | Quantitative | Online Social Behavior (IV)<br>Social Support (MOD)<br>Self-Compassion (MOD)<br>College Student's Life Satisfaction | 185 from a mid-sized university | Results showed that survey questions pertained to hassles and stress perceptions, mental health, perceived social support, and self-compassion. |

|    |                                      |                                                                                                                                                                              |                                                                                                                                        |              |                                                                               |                            |                                                                                                                                                                                                                          |
|----|--------------------------------------|------------------------------------------------------------------------------------------------------------------------------------------------------------------------------|----------------------------------------------------------------------------------------------------------------------------------------|--------------|-------------------------------------------------------------------------------|----------------------------|--------------------------------------------------------------------------------------------------------------------------------------------------------------------------------------------------------------------------|
|    |                                      |                                                                                                                                                                              |                                                                                                                                        |              | (DV)                                                                          |                            |                                                                                                                                                                                                                          |
| 47 | (Saeed et al., 2023)<br>Pakistan     | Relationship Between Social Support, Social Media Usage, and Psychological Well-being among Undergraduates in Different Institutions of Punjab                               | To find the relationship between social support, social media usage, and psychological well-being among undergraduates aged 18-25.     | Quantitative | Distress (IV)<br>Mental Health(DV)                                            | 843 college students       | Results showed that social support received from online sources had no significant psychological impact.                                                                                                                 |
| 48 | (Xin, 2023)<br>China                 | The association between social support provision, psychological capital, subjective well-being, and sense of indebtedness among undergraduates with low socioeconomic status | To test whether and when social support provision can benefit the providers' positive psychological capital and subjective well-being. | Quantitative | Social Support (IV)<br>Social Media Usage (IV)<br>Psychological Wellbeing(DV) | 732 Chinese undergraduates | Results showed that impoverished college students' social support provision was positively associated with life satisfaction, positive affect, and psychological capital and negatively associated with adverse effects. |
| 49 | (Yıldırım & Green, 2023)<br>Pakistan | Social support and resilience mediate the relationship of stress with satisfaction with life and the flourishing of                                                          | To examine whether social support and resilience mediate the association of stress with satisfaction with                              | Quantitative | Stress (IV)<br>Social support (MED)<br>Resilience (MED)<br>Satisfaction with  | 230 undergraduate students | Results revealed that (i) perceived stress was indirectly related to satisfaction with life via social support and                                                                                                       |

|    |                                | youth.                                                                                                                                              | life and flourishing.                                                                                                                                       |              | life flourishing and of youth (DV)                                                    |                    | resilience.                                                                                                                                                                 |
|----|--------------------------------|-----------------------------------------------------------------------------------------------------------------------------------------------------|-------------------------------------------------------------------------------------------------------------------------------------------------------------|--------------|---------------------------------------------------------------------------------------|--------------------|-----------------------------------------------------------------------------------------------------------------------------------------------------------------------------|
| 50 | (Han Mo et al., 2024)<br>China | Communication in social networking sites on offline and online social support and life satisfaction among university students: Tie strength matters | To examine the association between social interaction with weak and strong ties to SNS and life satisfaction among Chinese college and university students. | Quantitative | Communication in Social Networking Sites (IV)<br><br>Life Satisfaction (DV)           | 26,547 students    | Results showed that social interaction with strong ties to SNS was associated with increased offline social support but had no significant association with online backing. |
| 51 | (Yang et al., 2024)<br>China   | Gratitude predicts well-being via resilience and social support in emerging adults: A daily diary study.                                            | To better understand how gratitude is linked to well-being, the present study adopted a daily diary method to explore the mediating roles.                  | Quantitative | Gratitude (IV)<br><br>Resilience (MED)<br>Social support (MED)<br><br>well-being (DV) | 153 undergraduates | Results showed that daily resilience and social support mediated the relationship between gratitude and well-being.                                                         |
